# Supplementary material
Source: PubMed Central journal article supplement (PMC4830143)
Supplement: NIHMS725436-supplement-213_2015_4074_MOESM1_ESM.pdf [file NIHMS725436-supplement-213_2015_4074_MOESM1_ESM.pdf]

### Supplementary Materials

**Table S1.** Zero order correlations among maternal, paternal, and combined (maternal and paternal) substance use indices.

|                         | FH Combined | Overall FH Substance Use |
|-------------------------|-------------|--------------------------|
| M Smoking               | .809***     | .674***                  |
| M Alcohol Use           | .679***     | .533***                  |
| M Illicit Drug Use      | .824***     | .489***                  |
| M Overall Substance Use | -           | .804***                  |
| P Smoking               | .832***     | .678***                  |
| P Alcohol Use           | .873***     | .635***                  |
| P Illicit Drug Use      | .803***     | .467***                  |
| P Overall Substance Use | -           | .854***                  |

*Notes:* M = maternal; P = paternal; FH = family history; FH Combined refers to the combined (i.e., the average of the maternal and paternal indices) index for the substance listed in the first column.

\*\*\*  $p < 0.001$
