# Supplementary material
Source: PubMed Central journal article supplement (PMC4830143)
Supplement: NIHMS725436-supplement-213_2015_4074_MOESM2_ESM.pdf [file NIHMS725436-supplement-213_2015_4074_MOESM2_ESM.pdf]

**Table S2.** Zero order relationships among DD (MCQk), personal substance use, and FH of substance use

|                             | MCQk                    |                    |
|-----------------------------|-------------------------|--------------------|
|                             | Correlation Coefficient | Significance Level |
| Smoking                     | .21                     | .000               |
| Alcohol Use                 | .07                     | .051               |
| Marijuana Use               | .10                     | .006               |
| Drug Experimentation        | .13                     | .000               |
| FH of Smoking               | .16                     | .000               |
| FH of Alcohol Use           | .09                     | .014               |
| FH of Illicit Drug Use      | .06                     | .085               |
| Overall FH of Substance Use | .16                     | .000               |
| Pretax Income               | -.17                    | .000               |

*Notes.* FH = family history; Drug Experimentation = number of illicit drugs ever used for those participants who endorsed ever using any illicit drug; MCQ = Multiple Choice Questionnaire; MCQk = average of the three logarithmically transformed *k* values from the standard MCQ.
