# Supplementary material
Source: PubMed Central journal article supplement (PMC4830143)
Supplement: NIHMS725436-supplement-213_2015_4074_MOESM3_ESM.pdf [file NIHMS725436-supplement-213_2015_4074_MOESM3_ESM.pdf]

**Table S3.** Mediation of the effect of FH of substance use on personal substance use through DD (MCQk)

| Mediation Relationship                                                  | Direct and Total Effects |           | Adjusted R <sup>2</sup><br>for DV<br>Model | Indirect<br>Effect | Bootstrapping     |                    |
|-------------------------------------------------------------------------|--------------------------|-----------|--------------------------------------------|--------------------|-------------------|--------------------|
|                                                                         |                          |           |                                            |                    | Lower BC<br>95%CI | Upper BC<br>95% CI |
| <b>Model 1:</b><br>FH of Smoking → MCQAvgk →<br>Smoking Frequency       | b(YX)                    | 1.3109*** |                                            |                    |                   |                    |
|                                                                         | b(MX)                    | .3493***  |                                            |                    |                   |                    |
|                                                                         | b(YM.X)                  | .3635***  | .0907***                                   | 0.127              | 0.0654            | 0.2185             |
|                                                                         | b(YX.M)                  | 1.1839*** |                                            |                    |                   |                    |
| <b>Model 3:</b><br>Overall FH → MCQAvgk → Smoking<br>Frequency          | b(YX)                    | 2.1526*** |                                            |                    |                   |                    |
|                                                                         | b(MX)                    | .6343***  |                                            |                    |                   |                    |
|                                                                         | b(YM.X)                  | .3760***  | .0775***                                   | 0.2385             | 0.1232            | 0.4031             |
|                                                                         | b(YX.M)                  | 1.9141*** |                                            |                    |                   |                    |
| <b>Model 4:</b><br>Overall FH → MCQAvgk → Drug<br>Experimentation       | b(YX)                    | 2.8745*** |                                            |                    |                   |                    |
|                                                                         | b(MX)                    | .6343***  |                                            |                    |                   |                    |
|                                                                         | b(YM.X)                  | .1989*    | .0825***                                   | 0.1262             | 0.0321            | 0.2605             |
|                                                                         | b(YX.M)                  | 2.7483*** |                                            |                    |                   |                    |
| <b>Model 5:</b><br>Overall FH → MCQAvgk → Marijuana<br>Use <sup>a</sup> | b(YX)                    | .6292**   |                                            |                    |                   |                    |
|                                                                         | b(MX)                    | .6399***  |                                            |                    |                   |                    |
|                                                                         | b(YM.X)                  | .0878     | .0286***                                   | 0.0562             | -0.0009           | 0.1321             |
|                                                                         | b(YX.M)                  | .5730**   |                                            |                    |                   |                    |

*Notes.* Number of bootstrapped resamples = 5,000; FH = family history; DD = delay discounting; *AUDIT* = *Alcohol Use Disorders Identification Test*; Drug Experimentation = number of illicit drugs ever used for those participants who endorsed ever using any illicit drug; MCQ = Multiple Choice Questionnaire; MCQk = average of the three logarithmically transformed *k* values from the standard MCQ; DV = dependent variable; BC = bias corrected; Y = dependent variable; M = mediator; b(YX) = direct effect of X on Y; b(MX) = direct effect of X on M; b(YM.X) = direct effect of M on Y, controlling for X; b(YX.M) = direct effect of X on Y, controlling for M. The indirect effect of X on Y through M is calculated by subtracting the direct effect of X on Y, controlling for M (i.e., b[YX.M]) from the total effect of X on Y (i.e., b[YX]).

<sup>a</sup>*n* = 730. \*\*\* *p* < 0.001; \*\* *p* < 0.01; \* *p* < 0.05.
